# Supplementary material for: Genetic Diversity and Thermal Performance in Invasive and Native Populations of African Fig Flies
Source: PubMed Central journal article supplement (PMC7306694; doi:10.1093/molbev/msaa050), 2020-02-28
Supplement: msaa050_supplementary_data.pdf [file msaa050_supplementary_data.pdf]

## Supplementary Material for:

### Genetic diversity and thermal performance in invasive and native populations of African fig flies

Aaron A. Comeault<sup>1,2</sup>, Jeremy Wang<sup>3</sup>, Silas Tittes<sup>4</sup>, Kristin Isbell<sup>2</sup>, Spencer Ingley<sup>5</sup>, Allen H. Hurlbert<sup>2</sup>, Daniel R. Matute<sup>2</sup>

<sup>1</sup>School of Natural Sciences, Bangor University, Bangor, Gwynedd, LL57 2DGA, UK

<sup>2</sup>Department of Biology, University of North Carolina, Chapel Hill, NC, 27599, USA

<sup>3</sup>Department of Genetics, University of North Carolina, Chapel Hill, NC, 27599, USA

<sup>4</sup>Department of Evolution and Ecology, University of California, Davis, CA, 95616, USA

<sup>5</sup>Faculty of Sciences, Brigham Young University, Hawaii, Laie, 96762 USA

Corresponding author: [a.comeault@bangor.ac.uk](mailto:a.comeault@bangor.ac.uk)

#### **This file contains:**

1. Supplementary Methods; pp. 2-9
2. Supplementary References; p. 10
3. Supplementary Tables S1 – S7; pp. 11-17
4. Supplementary Figures S1 – S6; pp. 18-23

## 1. Supplementary Methods

### 1.1 Sampling procedure

To assess patterns of genetic diversity across populations of *Z. indianus* we sampled populations from Kenya, Zambia, São Tomé, and Senegal (both forest/savannah outside of Niokolo-Koba National Park and coastal desert in the northwest of the country) in their native Africa, and Hawaii (Oahu), Tennessee (Nashville), and North Carolina (Chapel Hill) in their invasive range. Across African locations we also sampled other *Zaprionus* species, including two populations of *Z. africanus* (São Tomé and Kenya), two populations of *Z. tuberculatus* (São Tomé and the Senegal-desert site), and one population each of *Z. inermis*, *Z. tsacasi*, *Z. taronus*, and *Z. nigranus* (São Tomé). Live flies were aspirated directly from traps and within one hour of collection, anesthetised with flynap (triethylamine in alcohols; Carolina Biological Supply) and identified under light microscopes. Up to 50 individual females from the genus *Zaprionus* (per sample location) were moved into vials containing hydrated instant drosophila media to establish isofemale lines. Males and excess females were preserved in 100% ethanol.

### 1.2 Genome assembly

For each species, we extracted genomic DNA from pools of 5 to 30 male flies from a single isofemale line and sequenced those extractions using Illumina and Oxford Nanopore (ONT) sequencers or, for a subset of species, ONT sequencers only (Table S1). For species with both Illumina and ONT data, we generated initial assemblies with `SPAdes v3.12.0` (Bankevich et al. 2012). Assembled contigs were processed by `Redundans v0.13c` (Pryszcz and Gabaldón 2016) to remove residual redundant haplotypes. Nanopore reads were corrected using FMLRC (Wang et al. 2018) and used to scaffold assembled contigs using `LINKS v1.8.5` (Warren et al. 2015) with the recommended iterative approach (<https://github.com/bcgsc/LINKS>). Resulting scaffolds were corrected, and consensus sequences were generated, using `Racon v1.3.2` (Vaser, Sović, Nagarajan, & Šikić, 2017) and `Pilon v2.11` (Walker et al. 2014). For species with

nanopore-only data, we mapped reads in a pairwise fashion using `Minimap2` v2.15-r905 (Li 2018: 2) and assembled with `Miniasm` v0.3-r179 (Li 2016). We then corrected and generated consensus genome sequences with four iterations of `Racon` v1.3.2 (Vaser et al. 2017) followed by `Medaka` v0.6.2 (<https://github.com/nanoporetech/medaka>), respectively.

### 1.3 Annotation

We isolated total RNA using a standard TRIzol protocol from sex-specific groups of one day old adult flies (2 to 5 flies per extraction) that were flash frozen in liquid nitrogen. Stranded RNA-seq libraries were then constructed for each pool and sequencing was carried out on two lanes of an Illumina HiSeq 2500, run in rapid mode with 2 x 150 cycles. This sequencing approach generated between 21 and 32 million reads per extraction. Library construction and sequencing was carried out at the University of North Carolina Medical School's High-Throughput Sequencing Facility. We assembled a transcriptome for *Z. africanus* (1m, 2f pools), *Z. tuberculatus* (2f pools), *Z. nigranus* (2m, 2f pools), *Z. indianus* (2m, 2f pools), and *Z. tsacasi* (1m, 1f pools) using `Trinity` (Grabherr et al. 2011; Haas et al. 2013) run with default parameters. We then used `MAKER` (v3.01.02; (Holt and Yandell 2011; Campbell et al. 2014)) to annotate each genome, including `RepeatMasker` (v4.07; (Smit and Green 2013)) and `est2genome` to directly predict genes from assembled transcripts. Functional annotations were predicted using `BLASTP` (v2.7.1) against Swiss-Prot with an e-value cutoff of 0.000001.

### 1.4 Resequencing and genotyping

We extracted genomic DNA from either individual wild-caught flies or from a single offspring of a wild-caught female (i.e. first generation offspring) using Genetra Puregene Tissue Kits (Qiagen, Valencia, CA, USA), constructed barcoded libraries for sequencing using KAPA HyperPrep kits (Roche Sequencing, Pleasanton, CA) with a target fragment size of 500 bp, and sequenced in pools of 10 to 20 libraries per lane on either Illumina HiSeq 2500 or 4000 machines, generating either 2×125bp or 2×150bp reads,

respectively. Library preparation and sequencing was done at the University of North Carolina (UNC) School of Medicine's high-throughput sequencing facility.

Raw sequence data was initially parsed and barcodes were removed by the UNC High-throughput sequencing facility. We then mapped parsed reads to each individual's respective reference genome using the *BWA mem* algorithm (v0.7.15). We sorted and filtered mapped reads using *SAMTOOLS* (v1.4), marked duplicates using the *PICARD MarkDuplicates* tool (v2.2.4), and realigned around indels using *GATK's RealignerTargetCreator* and *IndelRealigner* tools (v3.8; (McKenna et al. 2010)). Processed alignment files (.bam format) were generated separately for each individual using this pipeline.

We estimated genotypes for each individual using *GATK's HaplotypeCaller* tool with options "--emitRefConfidence GVCF", "--minReadsPerAlignmentStart 4", "--standard\_min\_confidence\_threshold\_for\_calling 8.0", and "--minPruning 4". We then performed joint genotyping using *GATK's GenotypeGVCFs* tool. We filtered SNPs using *GATK's VariantFiltration* tool with option "--filterExpression \"QD < 2.0 || FS > 60.0 || SOR > 3.0 || MQ < 40.0 || MQRankSum < -12.5 || ReadPosRankSum < -8.0\"" and hard-filtered sites genotyped in fewer than two individuals (*VCFtools* (v0.1.15) option "--max-missing 0.5"). To facilitate comparisons across populations where we sampled different numbers of individuals, joint genotyping and filtering was carried out on randomly selected groups of four individuals (8 chromosomes) per population, except for the population of *Z. africanus* sampled from São Tomé, where we only sampled three individuals. Lastly, for each species, we masked sites in the genome if coverage was greater than twice, or less than half, the average coverage observed across all sequenced individuals of that species.

### 1.5 Differentiation among populations of *Z. indianus*

We estimated differentiation among populations of *Z. indianus* using principal component analysis, population assignment, and genomic window analyses. Principal component analysis (PCA) and population assignment were carried out using the *admix* method implemented in *PCAngsd* (Meisner and Albrechtsen 2018). These analyses were

carried out on genotype likelihoods estimated using the `GATK` method implemented in `ANGSD` (McKenna et al. 2010; Korneliussen et al. 2014). To explore genome-wide differentiation between populations we estimated  $F_{ST}$  in 5 kb non-overlapping genomic windows using `VCFtools` (v0.1.15). We first jointly genotyped all *Z. indianus* samples using `GATK`'s `GenotypeGVCFs` tool and applied filtering as described above (see section 1.4). The resulting filtered set of variants was used as input for the window analysis conducted with `VCFtools`.

### 1.6 Estimating genetic diversity

We estimated kinship, using filtered genotypes, for all within-population pairwise comparisons using the `KING` method (Manichaikul et al. 2010) as implemented in the `VCFtools` “--relatedness2” tool and estimated the inbreeding coefficient ( $F$ ) for each individual based on filtered genotypes using the `VCFtools` “--het” tool. We excluded coverage-masked sites using the “--exclude-positions” filter option. Because scaffolds in our assemblies belonging to the sex chromosomes have not been identified, we restricted our analysis of inbreeding to include only females, because homozygous genotype calls for males on the X chromosome would inflate estimates of inbreeding. In total, we estimated  $F$  for 7 females from the invasive range and 12 females from the native range of *Z. indianus*.

Population genetic metrics of genetic diversity were computed using `VCFtools` with coverage-masked sites excluded using the “--exclude-positions” filter option. Because  $\pi_{SNP}$  and  $S$  were highly correlated in all populations ( $r > 0.963$ ), we focus primarily on  $S$ : the number of sites with segregating variation within a given 5 Kb window. We summarize estimates of genetic diversity within each population as median, 5% empirical quantile, and 95% empirical quantile values (Table S4).

We explored the effect of being located in or around genes on levels of genetic diversity by first comparing genetic diversity across all genomic windows to diversity in windows that overlapped an annotated `BUSCO` gene (Waterhouse et al. 2018). We include this category of distinct annotations because these genes (2,799 total) have been curated as single-copy orthologs in 25 dipteran species and we were able to annotate a

high percentage (minimum 90.7%, maximum 97.3%) as being present in complete single-copies in the de novo assemblies we generated for this study (Table S2). Comparing diversity within these “BUSCO windows” allows for less biased comparisons between species because these windows should be less affected by aspects of genome evolution such as changes in gene copy number.

To test whether genomic regions that overlapped with gene annotations differed in levels of genetic diversity compared to regions away from genes, we used generalized linear models (GLMs) with poisson distributed error (`glm()` function in R) to model the number of segregating sites ( $S$ ) within a genomic window as a function of the position of that window relative to a gene annotation. We classified genomic windows as overlapping, adjacent to (within 5,000 bp), or distant from ( $> 5,000$  bp) the nearest gene annotation. We carried out this analysis separately for each population for which we generated annotations for their species’ respective genome assembly ( $N = 15$ ). For populations of *Z. indianus*, we were also interested in whether aspects of biological invasion had a different effect on levels of genetic diversity depending on the proximity of a genomic region to a gene. We therefore used a GLM to test the interaction between gene region type (i.e. overlapping, adjacent, or distant) and invasion status (i.e. invasive population of *Z. indianus*, native population of *Z. indianus*, or population of non-invasive species of *Zaprionus*) on median levels of genetic diversity across genomic windows.

### *1.7 Estimating recombination rates across the Z. indianus genome and its effect on genetic diversity*

We estimated population recombination rates ( $\rho_{\text{rec}} = 2Nr$ ) across the *Z. indianus* genome using the maximum likelihood method implemented in `LDhelmet` (v1.10; (Chan et al. 2012)). Before running `LDhelmet`, we generated phased haplotypes for the 14 *Z. indianus* sampled from Senegal (generating 28 phased haplotypes) using read-aware phasing (`Shapeit v2.837`; (Delaneau et al. 2013)). Phasing was carried out for the 40 largest scaffolds of the *Z. indianus* assembly, totalling 61.2 Mb of sequence or ~42% of the genome. We then ran `LDhelmet` on the phased data by first generating haplotype configuration files for each individual using the “`find_confs`” script, specifying a window

size of 50 SNPs. We then computed lookup tables using the “table\_gen” script, specifying a population-scaled mutation rate of  $\theta = 0.034$  (Watterson’s  $\theta$ ; estimated from the data using ANGSD), and a grid of recombination rate values of [0.0 0.1 10.0 1.0 100.0]. We estimated Padé coefficients, specifying  $\theta = 0.034$  and 11 replicates. Finally, we estimated recombination rates, running LDhelmet’s rjMCMC algorithm with a block penalty of 10 and a burn-in of 100,000 MCMC iterations followed by 1,000,000 MCMC iterations and extracted the mean recombination rate estimate between each pair of SNPs using LDhelmet’s “post\_to\_text” script. To summarize variation in recombination rate across the genome, we first removed unrealistically high estimates of  $\rho_{\text{rec}}$  (i.e.  $\rho_{\text{rec}} > 1$ , corresponding to a recombination rate greater than  $\sim 15 \cdot 10^{-8}$ ) and then calculated the mean recombination rate in 5000 bp windows across the genome from median estimates provided by LDhelmet.

We tested for a correlation between genetic diversity ( $S$ ) and recombination rate, for each population of *Z. indianus*, by calculating Spearman’s  $\rho$  using the cor.test() function in R. We calculated the correlation between median recombination rate and the mean difference in  $S$  between invasive and native populations of *Z. indianus* across genomic windows. Because recombination rate was positively correlated with diversity and the number of SNPs in a genomic window affects the magnitude of change in genetic diversity that is possible, we restricted this analysis to windows with a mean number of SNPs in the across populations of *Z. indianus* in their native range between 150 and 300. To further account for differences in diversity across windows as a function of local recombination rate we scaled the observed difference in mean  $S$  between the invasive and native ranges of *Z. indianus* by the mean number of SNPs within genomic windows binned into five recombination rate quantiles. Our rationale for this approach was to test whether the proportional reduction in diversity in invasive populations of *Z. indianus* was greater for regions of the genome with low recombination rates, as would be expected if selection was acting to drive the genetic diversity lower in invasive populations.

### 1.8 Measuring thermal performance

We measured adult-to-adult performance under four different temperatures and a 10:14 hour night:day light cycle. Temperatures were (night:day) 11°C:16°C, 16°C:21°C, 21°C:26°C, and 26°C:31°C, resulting in mean hourly temperatures of 13.9, 18.9, 23.9, and 28.9°C, respectively. To initiate the experiment, individuals were collected as one to three-day old adults, briefly anesthetized with CO<sub>2</sub>, and placed as individual pairs into vials containing standard cornmeal agar medium. Each pair was then allowed to recover from anesthesia for 12 to 24 hours at room temperature before being randomly assigned to one of the four temperature treatments. Each pair of flies was then allowed to lay eggs for 7 to 9 days, after which they were removed from the vials and a dampened kimwipe was added to each vial as a pupation site for the larvae. We then counted the total number of offspring that successfully enclosed within each vial. We measured adult-to-adult performance in this way for a total of 900 pairs, with an average of 9 pairs per temperature per species. Temperature and light was controlled using Percival incubators (model DR-36VL). Relative humidity within the incubators was negatively correlated with temperature, but was maintained between 80% and 50%.

We modified the original model presented in (Tittes et al. 2019) to account for higher variability in reproduction and survival in our dataset compared to the data on which the model was originally developed. We modeled the data as a mixture of a Gaussian probability density that described thermal performance and a Bernoulli probability mass that described excess zeros caused by mortality and failure of pairs to reproduce, which we will subsequently refer to as "mortality" for simplicity. We assumed the probability of mortality was inversely proportional to the mean thermal performance, such that more zeros are expected to occur near the thermal tolerance limits. The Bayesian p-value for the model was 0.77, indicating an adequate goodness-of-fit of the model to the data. Other modeling details including values chosen for priors remained the same as in Tittes et al. (2019). We have posted the Stan code that provides a precise description of the model at: <https://github.com/silastittes/performr/tree/zin>.

In the main text, we report on parameter estimates of thermal performance minimum ( $T_{\min} == x_{\min}$ ), thermal maximum ( $T_{\max} == x_{\max}$ ), thermal optimum ( $T_{\text{optimum}} == \text{maxima}$ ), maximum realized fitness (max. fitness == stretch), and a measure of thermal niche breadth ( $B_{50}$ ), each derived from the estimated thermal performance



curves. Each of these parameters, except for  $B_{50}$ , is described in Tittes et al. (2019). We estimated  $B_{50}$  as the difference in temperature values that captured the central 50% of the curve area, and was calculated as the difference between

$$\text{critical} = [(1 - ((1 - X\_CRITICAL)^{1/\text{shape}_2}))^{1/\text{shape}_1}] * (x\_max - x\_min) + x\_min,$$

where  $X\_CRITICAL$  was chosen to be 0.75 0.25, respectively.

## 2. Supplementary References

- Bankevich A, Nurk S, Antipov D, Gurevich AA, Dvorkin M, Kulikov AS, Lesin VM, Nikolenko SI, Pham S, Prjibelski AD, et al. 2012. SPAdes: A New Genome Assembly Algorithm and Its Applications to Single-Cell Sequencing. *J. Comput. Biol.* 19:455–477.
- Campbell MS, Holt C, Moore B, Yandell M. 2014. Genome Annotation and Curation Using MAKER and MAKER-P. *Curr. Protoc. Bioinforma.* 48:4.11.1-39.
- Chan AH, Jenkins PA, Song YS. 2012. Genome-Wide Fine-Scale Recombination Rate Variation in *Drosophila melanogaster*. *PLOS Genet.* 8:e1003090.
- Grabherr MG, Haas BJ, Yassour M, Levin JZ, Thompson DA, Amit I, Adiconis X, Fan L, Raychowdhury R, Zeng Q, et al. 2011. Full-length transcriptome assembly from RNA-Seq data without a reference genome. *Nat. Biotechnol.* 29:644–652.
- Haas BJ, Papanicolaou A, Yassour M, Grabherr M, Blood PD, Bowden J, Couger MB, Eccles D, Li B, Lieber M, et al. 2013. De novo transcript sequence reconstruction from RNA-Seq: reference generation and analysis with Trinity. *Nat. Protoc.* [Internet] 8. Available from: <https://www.ncbi.nlm.nih.gov/pmc/articles/PMC3875132/>
- Holt C, Yandell M. 2011. MAKER2: an annotation pipeline and genome-database management tool for second-generation genome projects. *BMC Bioinformatics* 12:1–14.
- Korneliussen TS, Albrechtsen A, Nielsen R. 2014. ANGSD: Analysis of Next Generation Sequencing Data. *BMC Bioinformatics* 15:356.
- Li H. 2016. Minimap and miniasm: fast mapping and de novo assembly for noisy long sequences. *Bioinformatics* 32:2103–2110.
- Li H. 2018. Minimap2: pairwise alignment for nucleotide sequences. *Bioinformatics* 34:3094–3100.
- McKenna A, Hanna M, Banks E, Sivachenko A, Cibulskis K, Kernytsky A, Garimella K, Altshuler D, Gabriel S, Daly M, DePristo MA. 2010. The genome analysis toolkit: A MapReduce framework for analyzing next-generation DNA sequencing data. *Genome Res.* 20:254–260
- Meisner J, Albrechtsen A. 2018. Inferring Population Structure and Admixture Proportions in Low-Depth NGS Data. *Genetics* 210:719–731.
- Pryszcz LP, Gabaldón T. 2016. Redundans: an assembly pipeline for highly heterozygous genomes. *Nucleic Acids Res.* 44:e113–e113.
- Smit A, Green P. 2013. RepeatMasker Open-4.0. Available from: <http://www.repeatmasker.org>
- Tittes SB, Walker JF, Torres-Martínez L, Emery NC. 2019. Grow Where You Thrive, or Where Only You Can Survive? An Analysis of Performance Curve Evolution in a Clade with Diverse Habitat Affinities. *Am. Nat.* 193:530–544.
- Vaser R, Sović I, Nagarajan N, Šikić M. 2017. Fast and accurate de novo genome assembly from long uncorrected reads. *Genome Res.* 27:737–746.
- Walker BJ, Abeel T, Shea T, Priest M, Abouelliel A, Sakthikumar S, Cuomo CA, Zeng Q, Wortman J, Young SK, et al. 2014. Pilon: An Integrated Tool for Comprehensive Microbial Variant Detection and Genome Assembly Improvement. *PLOS ONE* 9:e112963.
- Wang JR, Holt J, McMillan L, Jones CD. 2018. FMLRC: Hybrid long read error correction using an FM-index. *BMC Bioinformatics* 19:50.
- Warren RL, Yang C, Vandervalk BP, Behsaz B, Lagman A, Jones SJM, Birol I. 2015. LINKS: Scalable, alignment-free scaffolding of draft genomes with long reads. *GigaScience* [Internet] 4. Available from: <https://academic.oup.com/gigascience/article/4/1/s13742-015-0076-3/2707579>

**Table S1.** Summary of the data used to generate each of the seven draft genome assemblies reported in the main text. The amount of sequence data generated for each species and each sequencing technology is given in billions of base pairs (Gbp). For nanopore sequencing we also report the number of reads in millions (M) and the mean read length in base pairs.

| species                 | Collection location | Illumina read type    | Illumina amount | Nanopore reads (N) | Nanopore amount | Nanopore mean read length |
|-------------------------|---------------------|-----------------------|-----------------|--------------------|-----------------|---------------------------|
| <i>Z. indianus</i>      | Florida             | MiSeq<br>250 x 2      | 8.6 Gbp         | 1.7M               | 4.2 Gbp         | 2471                      |
| <i>Z. africanus</i>     | Sao Tome            | n/a                   | n/a             | 1.7M               | 7.4 Gbp         | 4259                      |
| <i>Z. nigranus</i>      | Sao Tome            | MiSeq<br>300 x 2      | 11.1 Gbp        | 1.6M               | 1.9 Gbp         | 1250                      |
| <i>Z. taronus</i>       | Sao Tome            | n/a                   | n/a             | 2.5M               | 10.0 Gbp        | 3900                      |
| <i>Z. inermis</i>       | Sao Tome            | n/a                   | n/a             | 3.1M               | 10.6 Gbp        | 3400                      |
| <i>Z. tuberculatus*</i> | Zambia              | n/a                   | n/a             | n/a                | n/a             | n/a                       |
| <i>Z. tsacasi</i>       | Sao Tome            | HiSeq 2500<br>150 x 2 | 14.9 Gbp        | .945M              | 2.5 Gbp         | 2646                      |

\* The *Z. tuberculatus* assembly was generated by Dovetail genomics with their proprietary Chicago libraries, a Hi-C library, and Illumina sequence data.

**Table S2.** Summary statistics for each of the seven draft genome assemblies reported in the main text. BUSCO annotation report is based on a total of 2799 single copy orthologs curated in 25 genomes of different species of Diptera. Annotations were generated using RNA-seq data, Trinity, and the MAKER annotation pipeline (see Supplementary Methods and the Main Text).

| species                | Assembly size (Mbp) | # contigs | N50 (bp)   | % complete BUSCO | % complete single-copy BUSCO | % duplicated BUSCO | # annotated transcripts |
|------------------------|---------------------|-----------|------------|------------------|------------------------------|--------------------|-------------------------|
| <i>Z. indianus</i>     | 145.7               | 649       | 773,890    | 96.6             | 96.1                         | 0.5                | 10,013                  |
| <i>Z. africanus</i>    | 167.6               | 689       | 1,499,604  | 95               | 94.1                         | 0.9                | 10,424                  |
| <i>Z. nigranus</i>     | 142.9               | 2553      | 776,169    | 97.8             | 97.3                         | 0.5                | 9,769                   |
| <i>Z. taronus</i>      | 187.9               | 536       | 2,214,536  | 95.2             | 93.7                         | 1.5                | 9,275                   |
| <i>Z. inermis</i>      | 165.5               | 572       | 2,453,702  | 94.9             | 94                           | 0.9                | n/a                     |
| <i>Z. tuberculatus</i> | 176.2               | 880       | 25,350,852 | 93.2             | 90.7                         | 2.5                | 11,071                  |
| <i>Z. tsacasi</i>      | 150.1               | 1269      | 335,836    | 96.3             | 95.7                         | 0.6                | 10,408                  |

**Table S3.** Populations and sample sizes for which whole genome resequencing data was generated to estimate genetic diversity. Sample sizes are reported as the number of chromosomes sampled from each population (i.e. 2 x the number of individuals sampled).

| species                | location            | 2N |
|------------------------|---------------------|----|
| <i>Z. indianus</i>     | Hawaii              | 8  |
| <i>Z. indianus</i>     | North Carolina      | 12 |
| <i>Z. indianus</i>     | Tennessee           | 8  |
| <i>Z. indianus</i>     | Sao Tome            | 12 |
| <i>Z. indianus</i>     | Senegal<br>(forest) | 14 |
| <i>Z. indianus</i>     | Senegal<br>(desert) | 14 |
| <i>Z. indianus</i>     | Kenya               | 14 |
| <i>Z. indianus</i>     | Zambia              | 12 |
| <i>Z. africanus</i>    | Sao Tome            | 6  |
| <i>Z. africanus</i>    | Kenya               | 10 |
| <i>Z. nigranus</i>     | Sao Tome            | 10 |
| <i>Z. taronus</i>      | Sao Tome            | 22 |
| <i>Z. inermis</i>      | Sao Tome            | 8  |
| <i>Z. tuberculatus</i> | Senegal             | 14 |
| <i>Z. tuberculatus</i> | Sao Tome            | 14 |
| <i>Z. tsacasi</i>      | Sao Tome            | 8  |

**Table S4.** Summary of genetic diversity within each population. Population identifiers are in the format species-POPULATION-replicate, where species is abbreviated as “z” followed by the first three letters of the species name and population is the abbreviation of the collection location. Summary statistics were calculated from groups of four individuals and in populations where more than four individuals were sampled, multiple subsamples (replicates) were analyzed. Mean, 5% empirical quantile (5%), and 95% empirical quantile (95%) for nucleotide diversity ( $\pi$ ), the number of segregating sites ( $S$ ), and Tajima’s  $D$  ( $T. D$ ) calculated in 5 kb windows across the genome are reported.

| population           | $\pi$<br>median | $\pi$<br>(5%) | $\pi$<br>(95%) | $S$<br>median | $S$<br>(5%) | $S$<br>(95%) | $T. D$<br>median | $T. D$<br>(5%) | $T. D$<br>(95%) |
|----------------------|-----------------|---------------|----------------|---------------|-------------|--------------|------------------|----------------|-----------------|
| zafr-KEN-1           | 0.0169          | 0.0011        | 0.0276         | 231           | 3           | 366.2        | -0.66            | -1.10          | 0.11            |
| zafr-KEN-2           | 0.0173          | 0.0011        | 0.0279         | 235           | 4           | 371          | -0.68            | -1.13          | 0.09            |
| zafr-ST-1            | 0.0188          | 0.0010        | 0.0304         | 205           | 3           | 332          | -0.42            | -0.93          | 0.49            |
| zind-HI-1            | 0.0110          | 0.0006        | 0.0206         | 120           | 0           | 231          | 0.51             | -1.28          | 2.09            |
| zind-KEN-1           | 0.0171          | 0.0030        | 0.0274         | 219           | 37          | 339          | -0.54            | -1.05          | 0.17            |
| zind-KEN-2           | 0.0175          | 0.0029        | 0.0279         | 230           | 36          | 349          | -0.67            | -1.15          | 0.02            |
| zind-NC-1            | 0.0138          | 0.0016        | 0.0241         | 160           | 10          | 281          | 0.17             | -1.02          | 1.71            |
| zind-NC-2            | 0.0137          | 0.0014        | 0.0241         | 159           | 7           | 281          | 0.14             | -1.18          | 1.64            |
| zind-SEN<br>desert-1 | 0.0174          | 0.0021        | 0.0275         | 230           | 28          | 347          | -0.71            | -1.18          | -0.17           |
| zind-SEN<br>desert-2 | 0.0175          | 0.0022        | 0.0276         | 231           | 28          | 348          | -0.70            | -1.17          | -0.14           |
| zind-SEN<br>forest-1 | 0.0176          | 0.0021        | 0.0278         | 232           | 28          | 350          | -0.71            | -1.18          | -0.17           |
| zind-SEN<br>forest-2 | 0.0176          | 0.0021        | 0.0279         | 233           | 28          | 350          | -0.72            | -1.18          | -0.15           |
| zind-ST-1            | 0.0161          | 0.0018        | 0.0271         | 206           | 21          | 336          | -0.48            | -1.05          | 0.58            |
| zind-ST-2            | 0.0161          | 0.0018        | 0.0271         | 206           | 21          | 335          | -0.48            | -1.04          | 0.54            |
| zind-TN-1            | 0.0136          | 0.0015        | 0.0241         | 156           | 4           | 280.65       | 0.22             | -0.92          | 1.93            |
| zind-ZAM-1           | 0.0168          | 0.0026        | 0.0276         | 222           | 32          | 349          | -0.66            | -1.16          | 0.45            |
| zind-ZAM-2           | 0.0172          | 0.0027        | 0.0278         | 229           | 33          | 350          | -0.71            | -1.22          | -0.12           |
| zine-ST-1            | 0.0031          | 0.0001        | 0.0084         | 35            | 0           | 92           | 0.52             | -1.74          | 2.07            |
| znig-ST-1            | 0.0018          | 0.0005        | 0.0045         | 23            | 6           | 55           | 0.16             | -0.90          | 1.29            |
| znig-ST-2            | 0.0019          | 0.0005        | 0.0045         | 23            | 6           | 55           | 0.12             | -0.92          | 1.14            |
| ztar-ST-1            | 0.0095          | 0.0003        | 0.0219         | 111           | 0           | 260          | -0.34            | -1.17          | 0.42            |
| ztar-ST-2            | 0.0092          | 0.0003        | 0.0216         | 107           | 0           | 257          | -0.30            | -1.15          | 0.43            |

|            |        |        |        |     |   |     |       |       |      |
|------------|--------|--------|--------|-----|---|-----|-------|-------|------|
| ztar-ST-3  | 0.0090 | 0.0003 | 0.0216 | 100 | 0 | 256 | -0.20 | -1.06 | 0.79 |
| ztsa-ST-1  | 0.0115 | 0.0007 | 0.0214 | 143 | 5 | 257 | -0.21 | -0.88 | 0.53 |
| ztub-SEN-1 | 0.0100 | 0.0003 | 0.0191 | 133 | 2 | 247 | -0.41 | -1.03 | 0.42 |
| ztub-SEN-2 | 0.0093 | 0.0003 | 0.0179 | 126 | 1 | 239 | -0.33 | -0.89 | 0.61 |
| ztub-ST-1  | 0.0122 | 0.0003 | 0.0223 | 152 | 1 | 272 | -0.37 | -0.89 | 0.52 |
| ztub-ST-2  | 0.0122 | 0.0003 | 0.0224 | 152 | 2 | 273 | -0.39 | -0.97 | 0.39 |

**Table S5.** Summary of genetic diversity within each population, as reported in Table S4, but restricted to genomic windows overlapping an annotated BUSCO gene. Only one replicate of four randomly selected individuals was run for each population, as results in Table S4 indicate that there was not a large variance between estimates generated from different subsamples of four individuals.

| population         | $\pi$<br>(median) | $\pi$<br>(5%) | $\pi$<br>(95%) | S<br>(median) | S<br>(5%) | S<br>(95%) | T. D<br>(median) | T. D<br>(5%) | T. D<br>(95%) |
|--------------------|-------------------|---------------|----------------|---------------|-----------|------------|------------------|--------------|---------------|
| zind-HI            | 0.0099            | 0.0018        | 0.0203         | 109           | 0         | 231        | 0.48             | -1.26        | 2.10          |
| zind-NC            | 0.0123            | 0.0031        | 0.0241         | 147           | 28.85     | 281.15     | 0.15             | -0.98        | 1.69          |
| zind-TN            | 0.0121            | 0.0029        | 0.0241         | 142           | 20        | 281        | 0.24             | -0.77        | 1.96          |
| zind-ST            | 0.0147            | 0.0032        | 0.0276         | 193           | 43        | 342        | -0.51            | -1.09        | 0.36          |
| zind-SEN<br>desert | 0.0156            | 0.0052        | 0.0278         | 213           | 79        | 351        | -0.72            | -1.21        | -0.28         |
| zind-SEN<br>forest | 0.0157            | 0.0052        | 0.0282         | 215           | 80        | 356        | -0.72            | -1.21        | -0.28         |
| zind-KEN           | 0.0153            | 0.0053        | 0.0275         | 203           | 74.7      | 341.15     | -0.55            | -1.06        | 0.11          |
| zind-ZAM           | 0.0152            | 0.0051        | 0.0280         | 206           | 71.85     | 353.15     | -0.67            | -1.22        | 0.15          |
| zafr-ST            | 0.0196            | 0.0056        | 0.0319         | 221           | 67        | 354        | -0.49            | -0.90        | 0.11          |
| zafr-KEN           | 0.0178            | 0.0050        | 0.0296         | 251           | 81        | 394.3      | -0.71            | -1.13        | -0.26         |
| ztub-ST            | 0.0124            | 0.0046        | 0.0211         | 160           | 61        | 263        | -0.40            | -0.84        | 0.14          |
| ztub-SEN           | 0.0109            | 0.0037        | 0.0192         | 150           | 50        | 252        | -0.45            | -0.87        | 0.23          |
| ziner-<br>m-ST     | 0.0029            | 0.0001        | 0.0070         | 33            | 1         | 77         | 0.53             | -1.80        | 2.08          |
| ztsac-ST           | 0.0095            | 0.0017        | 0.0206         | 121           | 24        | 247        | -0.21            | -0.97        | 0.39          |
| znig-ST            | 0.0013            | 0.0004        | 0.0036         | 17            | 4         | 44         | 0.09             | -1.03        | 1.19          |
| ztar-ST            | 0.0064            | 0.0011        | 0.0194         | 85            | 17        | 237        | -0.36            | -1.29        | 0.35          |

**Table S6.** Mean number of segregating sites (*S*) across 5 kb genomic windows grouped by their location relative to an annotated gene. Windows were classified as overlapping a gene, within 5 kb, but not overlapping (adjacent), or further than 5kb from a gene (distant). The last two columns show relative amounts of genetic diversity contained within windows that overlapped an annotated gene and either adjacent or distant genomic windows.

| population     | overlapping | adjacent | distant | overlapping/adjacent | overlapping/distant |
|----------------|-------------|----------|---------|----------------------|---------------------|
| zind-HI        | 129         | 134      | 133     | 0.9626866            | 0.9699248           |
| zind-NC        | 168         | 176      | 172     | 0.9545455            | 0.9767442           |
| zind-TN        | 166         | 172      | 167     | 0.9651163            | 0.994012            |
| zind-ST        | 221         | 230      | 224     | 0.9608696            | 0.9866071           |
| zind-SENdesert | 246         | 257      | 256     | 0.9571984            | 0.9609375           |
| zind-SENforest | 249         | 260      | 258     | 0.9576923            | 0.9651163           |
| zind-KEN       | 233         | 242      | 243     | 0.9628099            | 0.9588477           |
| zind-ZAM       | 238         | 248      | 243     | 0.9596774            | 0.9794239           |
| zafr-ST        | 237         | 230      | 214     | 1.0304348            | 1.1074766           |
| zafr-KEN       | 274         | 264      | 248     | 1.0378788            | 1.1048387           |
| ztub-ST        | 161         | 167      | 173     | 0.9640719            | 0.9306358           |
| ztub-SEN       | 146         | 145      | 145     | 1.0068966            | 1.0068966           |
| ztsac-ST       | 138         | 153      | 168     | 0.9019608            | 0.8214286           |
| znig-ST        | 20          | 24       | 27      | 0.8333333            | 0.7407407           |
| ztar-ST        | 102         | 130      | 152     | 0.7846154            | 0.6710526           |



**Table S7.** Pairwise sequence differences (percent differences) between the seven *Zaprionus* species analyzed in the main text. Genetic distances are derived from the 1709 BUSCOs used to generate the phylogeny shown in Figure 5a of the main text.

|                     | <i>africanus</i> | <i>indianus</i> | <i>inermis</i> | <i>nigranus</i> | <i>taronus</i> | <i>tsacasi</i> | <i>tuberculatus</i> |
|---------------------|------------------|-----------------|----------------|-----------------|----------------|----------------|---------------------|
| <i>africanus</i>    | 0.0              |                 |                |                 |                |                |                     |
| <i>indianus</i>     | 4.58             | 0.0             |                |                 |                |                |                     |
| <i>inermis</i>      | 13.69            | 13.48           | 0.0            |                 |                |                |                     |
| <i>nigranus</i>     | 6.29             | 5.98            | 13.15          | 0.0             |                |                |                     |
| <i>taronus</i>      | 6.78             | 6.58            | 13.53          | 4.30            | 0.0            |                |                     |
| <i>tsacasi</i>      | 13.43            | 13.20           | 8.87           | 12.87           | 13.27          | 0.0            |                     |
| <i>tuberculatus</i> | 13.54            | 13.34           | 9.05           | 12.97           | 13.37          | 4.38           | 0.0                 |

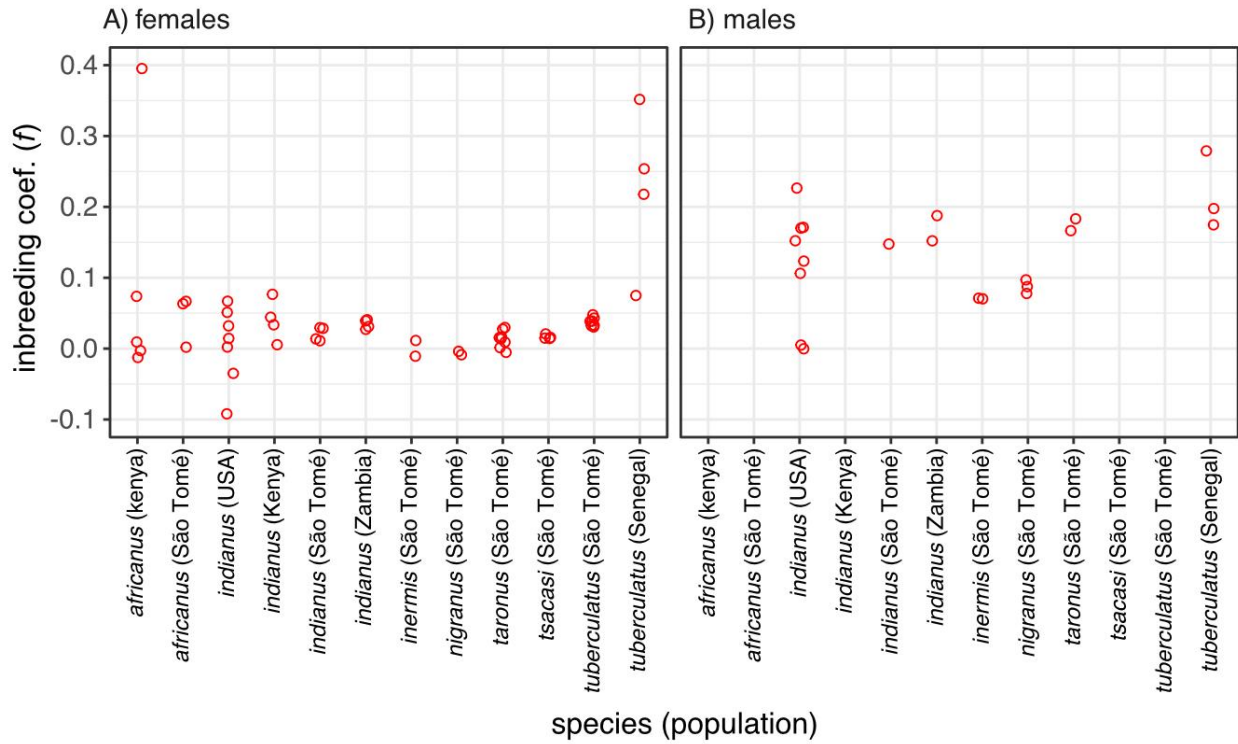

**Figure S1.** Estimated inbreeding coefficient ( $f$ ) for all sequenced individuals with known sex at time of sequencing (A: females; B: males). Inbreeding coefficients were estimated using the KING method as implemented in VCFTools (see Main Text for details).

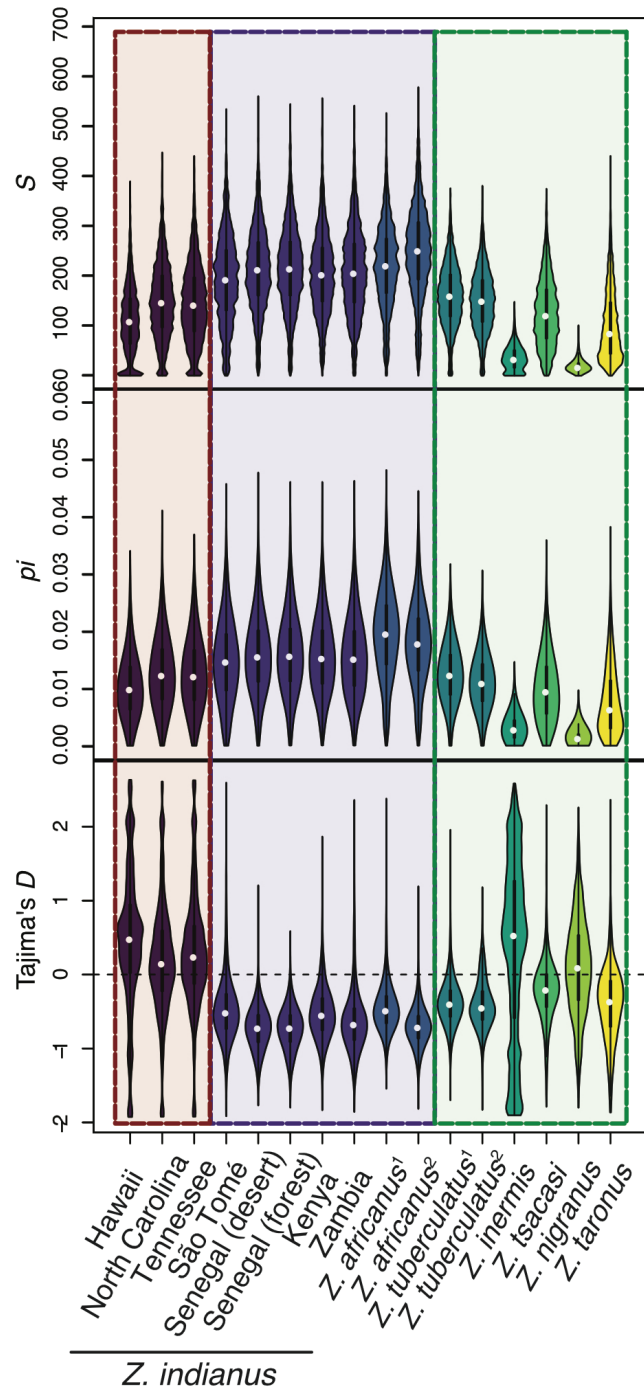

**Figure S2.** Estimates of genetic diversity summarized across 5 kb genomic windows that overlap with an annotated BUSCO. Shaded boxes group populations as invasive *Z. indianus* (three leftmost violins), native *Z. indianus* and *Z. africanus* (seven central violins), and other species (six rightmost violins). See Figure 2 in the main text for results across the entire genome. *Z. africanus*<sup>1</sup> and *Z. tuberculatus*<sup>1</sup> were sampled from Sao Tome, *Z. africanus*<sup>2</sup> from Kenya, and *Z. tuberculatus*<sup>2</sup> from Senegal (forest site).

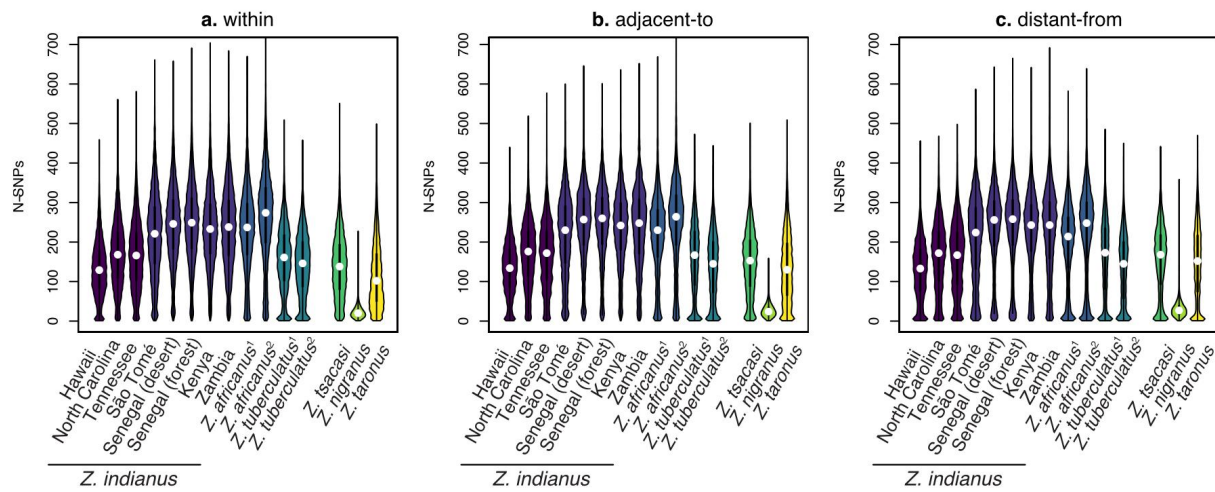

**Figure S3.** Genetic diversity ( $S == N\text{-SNPs}$ ) summarized for windows either overlapping an annotated gene (**a**), within 5kb of an annotated gene (**b**), or greater than 5kb from the nearest annotated gene (**c**). *Z. africanus*<sup>1</sup> and *Z. tuberculatus*<sup>1</sup> were sampled from São Tomé, *Z. africanus*<sup>2</sup> from Kenya, and *Z. tuberculatus*<sup>2</sup> from Senegal (forest site).

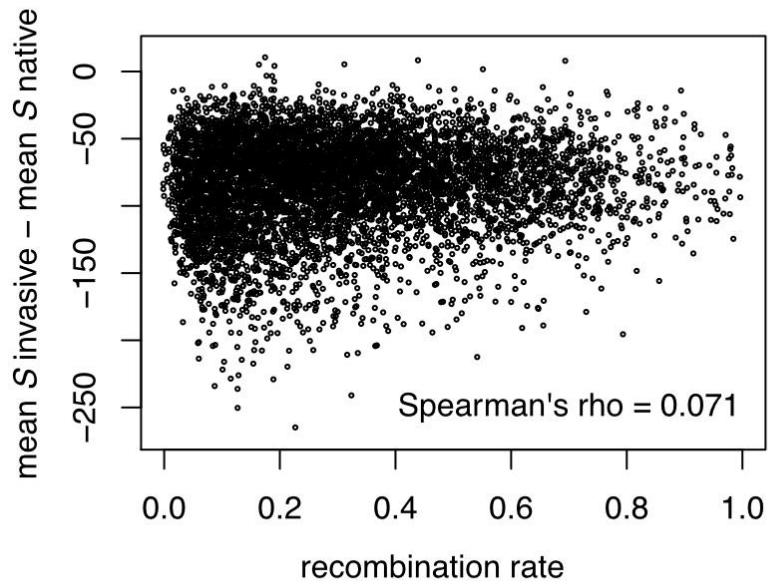

**Figure S4.** Correlation between the difference in amounts of genetic diversity (the number of segregating sites:  $S$ ; mean across invasive populations - mean across native populations) and (population) recombination rate for *Z. indianus*.

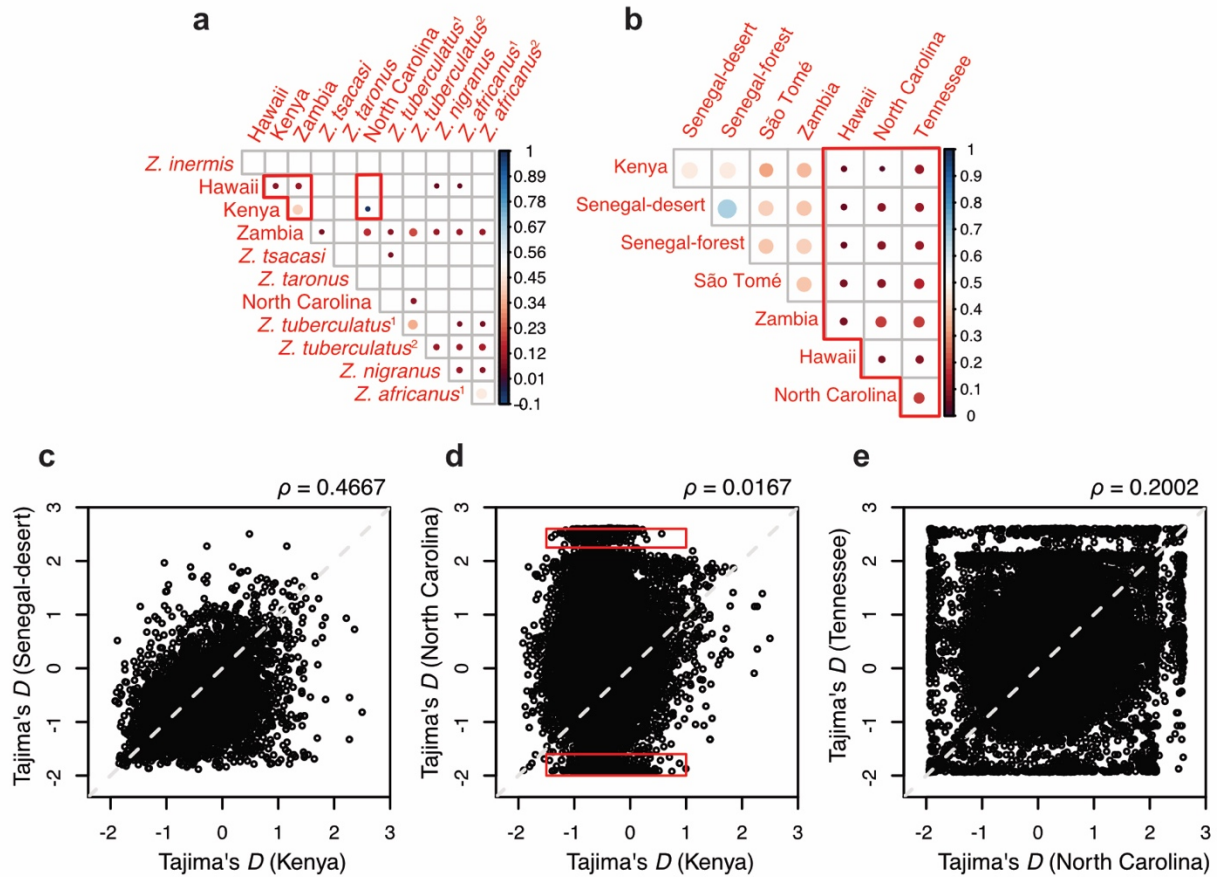

**Figure S5.** Tajima's *D* is weakly correlated or uncorrelated between different species of *Zaprionus* (a) and populations of *Z. indianus* (b). The strongest correlations in S (outside of populations of *Z. indianus* sampled from two locations in Senegal) were between geographically distant populations of *Z. indianus* in its native Africa (c) and the weakest correlation between *Z. indianus* populations was between a native and an invasive population (d). The two geographically proximate invasive populations of *Z. indianus* in North America showed a moderate correlation in Tajima's *D* across windows. Red polygons in a highlight comparisons between populations of *Z. indianus* and in b highlight comparisons between invasive populations. Red rectangles in panel d highlight genomic windows that show a pronounced shift in Tajima's *D* between the invasive population in North Carolina and the native population in Kenya.

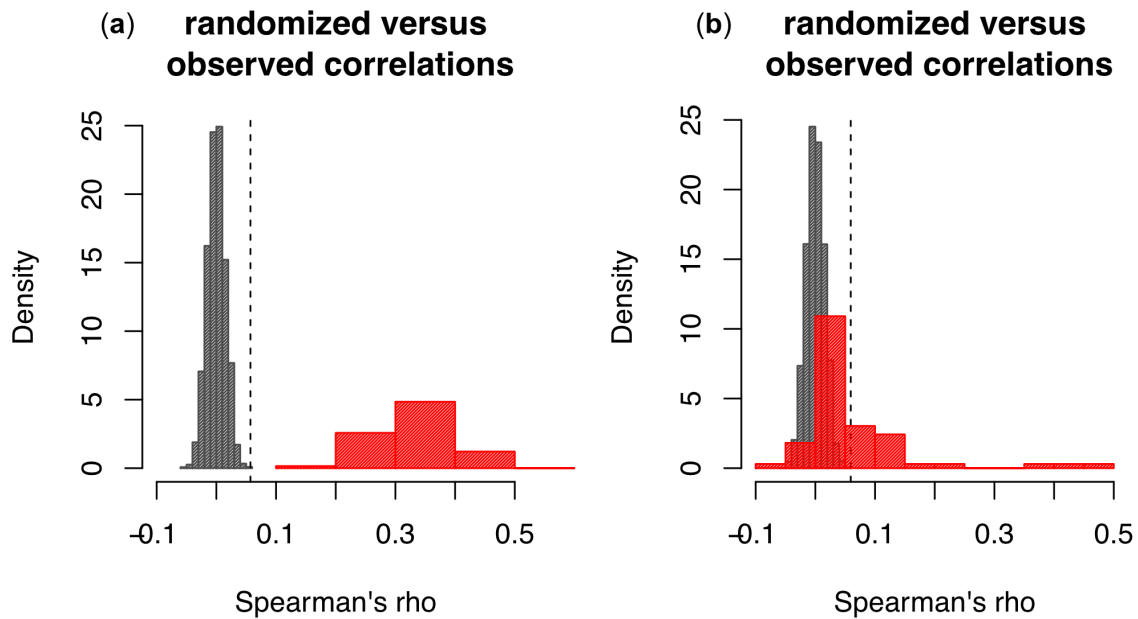

**Figure S6.** Randomized and observed correlation coefficients for genetic diversity (S; panel (a)) and Tajima's  $D$  (b). Grey histograms in each panel show the distribution of correlation coefficients generated when randomly selecting genomic windows that span BUSCO annotated genes in two species' genomes. Red histograms show observed correlation coefficients across all pairwise interspecific comparisons. The dashed vertical line in each panel represents the 95% tail of the randomized distribution.
